# Supplementary material for: A population‐based study to develop juvenile arthritis case definitions for administrative health data using model‐based dynamic classification
Source: Springer Nature journal article supplement (doi:10.1186/s12874-021-01296-9), 2021-05-16

Additional File: Supplementary Tables and Figures

**Table 1: Characteristics of the study cohort, stratified by juvenile arthritis (JA) case status and period of diagnosis**

| Characteristic           | Period of Diagnosis            |                                       |                                |                                      |
|--------------------------|--------------------------------|---------------------------------------|--------------------------------|--------------------------------------|
|                          | ≤ 2002 <sup>a</sup>            |                                       | 2003–2012                      |                                      |
|                          | JA Cases<br>(n = 275)<br>n (%) | Non-JA Controls<br>(n = 332)<br>n (%) | JA Cases<br>(n = 111)<br>n (%) | Non-JA Controls<br>(n = 79)<br>n (%) |
| Sex                      |                                |                                       |                                |                                      |
| Male                     | 94 (34.2)                      | 125 (37.6)                            | 40 (36.0)                      | 20 (25.3)                            |
| Female                   | 181 (65.8)                     | 207 (62.4)                            | 71 (64.0)                      | 59 (74.7)                            |
| Age at diagnosis (years) |                                |                                       |                                |                                      |
| 0–10                     | 188 (68.4)                     | 188 (56.6)                            | 40 (36.0)                      | 32 (40.5)                            |
| 11–15                    | 87 (31.6)                      | 144 (43.4)                            | 71 (64.0)                      | 47 (59.5)                            |
| Region of residence      |                                |                                       |                                |                                      |
| Urban                    | 152 (55.3)                     | 200 (60.2)                            | 66 (59.5)                      | 38 (48.1)                            |
| Rural                    | 123 (44.7)                     | 132 (39.8)                            | 45 (40.5)                      | 41 (51.9)                            |
| Income Quintile          |                                |                                       |                                |                                      |
| Q1 (Lowest/Not Found)    | 58 (21.1)                      | 79 (23.8)                             | 25 (22.5)                      | 23 (29.1)                            |
| Q2                       | 50 (18.2)                      | 60 (18.1)                             | 18 (16.2)                      | 17 (21.5)                            |
| Q3                       | 56 (20.4)                      | 53 (16.0)                             | 24 (21.6)                      | 14 (17.7)                            |
| Q4                       | 55 (20.0)                      | 74 (22.3)                             | 26 (23.4)                      | 17 (21.5)                            |
| Q5 (Highest)             | 56 (20.4)                      | 66 (19.9)                             | 18 (16.2)                      | 8 (10.1)                             |

<sup>a</sup> The ≤1992 and 1993-2002 period of diagnosis groups were combined due to small (< 5) cell sizes in the ≤1992 period of diagnosis group

**Table 2: Spearman correlation coefficients for the outcome variables across time periods**

**A) Any JA-related healthcare contact**

| Time Period | 1    | 2    | 3    | 4    | 5    | 6    | 7    | 8    | 9    | 10   | 11   | 12   | 13   | 14   | 15   |
|-------------|------|------|------|------|------|------|------|------|------|------|------|------|------|------|------|
| 1           | 1.00 |      |      |      |      |      |      |      |      |      |      |      |      |      |      |
| 2           | 0.64 | 1.00 |      |      |      |      |      |      |      |      |      |      |      |      |      |
| 3           | 0.52 | 0.76 | 1.00 |      |      |      |      |      |      |      |      |      |      |      |      |
| 4           | 0.44 | 0.66 | 0.85 | 1.00 |      |      |      |      |      |      |      |      |      |      |      |
| 5           | 0.40 | 0.53 | 0.68 | 0.78 | 1.00 |      |      |      |      |      |      |      |      |      |      |
| 6           | 0.33 | 0.47 | 0.61 | 0.68 | 0.77 | 1.00 |      |      |      |      |      |      |      |      |      |
| 7           | 0.33 | 0.46 | 0.53 | 0.61 | 0.68 | 0.77 | 1.00 |      |      |      |      |      |      |      |      |
| 8           | 0.25 | 0.33 | 0.42 | 0.50 | 0.60 | 0.65 | 0.74 | 1.00 |      |      |      |      |      |      |      |
| 9           | 0.27 | 0.34 | 0.43 | 0.47 | 0.53 | 0.57 | 0.67 | 0.70 | 1.00 |      |      |      |      |      |      |
| 10          | 0.19 | 0.30 | 0.34 | 0.38 | 0.45 | 0.53 | 0.58 | 0.59 | 0.73 | 1.00 |      |      |      |      |      |
| 11          | 0.20 | 0.22 | 0.27 | 0.31 | 0.36 | 0.41 | 0.46 | 0.48 | 0.57 | 0.65 | 1.00 |      |      |      |      |
| 12          | 0.17 | 0.15 | 0.17 | 0.22 | 0.26 | 0.30 | 0.36 | 0.37 | 0.47 | 0.55 | 0.70 | 1.00 |      |      |      |
| 13          | 0.17 | 0.13 | 0.19 | 0.20 | 0.23 | 0.28 | 0.29 | 0.28 | 0.35 | 0.41 | 0.57 | 0.68 | 1.00 |      |      |
| 14          | 0.13 | 0.12 | 0.13 | 0.15 | 0.18 | 0.22 | 0.25 | 0.24 | 0.27 | 0.34 | 0.48 | 0.53 | 0.68 | 1.00 |      |
| 15          | 0.10 | 0.10 | 0.11 | 0.13 | 0.17 | 0.22 | 0.25 | 0.22 | 0.26 | 0.32 | 0.41 | 0.46 | 0.59 | 0.69 | 1.00 |

B) Number of general practitioner (GP) visits

| Time Period | 1    | 2    | 3    | 4    | 5    | 6    | 7    | 8    | 9    | 10   | 11   | 12   | 13   | 14   | 15   |
|-------------|------|------|------|------|------|------|------|------|------|------|------|------|------|------|------|
| 1           | 1.00 |      |      |      |      |      |      |      |      |      |      |      |      |      |      |
| 2           | 0.71 | 1.00 |      |      |      |      |      |      |      |      |      |      |      |      |      |
| 3           | 0.60 | 0.64 | 1.00 |      |      |      |      |      |      |      |      |      |      |      |      |
| 4           | 0.60 | 0.61 | 0.62 | 1.00 |      |      |      |      |      |      |      |      |      |      |      |
| 5           | 0.58 | 0.57 | 0.58 | 0.63 | 1.00 |      |      |      |      |      |      |      |      |      |      |
| 6           | 0.49 | 0.49 | 0.53 | 0.57 | 0.65 | 1.00 |      |      |      |      |      |      |      |      |      |
| 7           | 0.43 | 0.42 | 0.46 | 0.52 | 0.53 | 0.57 | 1.00 |      |      |      |      |      |      |      |      |
| 8           | 0.37 | 0.39 | 0.46 | 0.45 | 0.50 | 0.50 | 0.57 | 1.00 |      |      |      |      |      |      |      |
| 9           | 0.35 | 0.37 | 0.40 | 0.43 | 0.44 | 0.44 | 0.51 | 0.52 | 1.00 |      |      |      |      |      |      |
| 10          | 0.32 | 0.31 | 0.34 | 0.40 | 0.40 | 0.40 | 0.43 | 0.46 | 0.50 | 1.00 |      |      |      |      |      |
| 11          | 0.33 | 0.35 | 0.40 | 0.42 | 0.41 | 0.44 | 0.46 | 0.46 | 0.51 | 0.51 | 1.00 |      |      |      |      |
| 12          | 0.26 | 0.29 | 0.33 | 0.31 | 0.34 | 0.35 | 0.34 | 0.37 | 0.40 | 0.45 | 0.51 | 1.00 |      |      |      |
| 13          | 0.27 | 0.29 | 0.30 | 0.28 | 0.35 | 0.35 | 0.34 | 0.35 | 0.40 | 0.47 | 0.42 | 0.55 | 1.00 |      |      |
| 14          | 0.20 | 0.23 | 0.20 | 0.23 | 0.26 | 0.27 | 0.27 | 0.29 | 0.27 | 0.34 | 0.37 | 0.47 | 0.53 | 1.00 |      |
| 15          | 0.25 | 0.24 | 0.26 | 0.26 | 0.28 | 0.30 | 0.26 | 0.30 | 0.30 | 0.40 | 0.34 | 0.41 | 0.46 | 0.48 | 1.00 |

**C) Number of specialist physician visits**

| Time Period | 1    | 2    | 3    | 4    | 5    | 6    | 7    | 8    | 9    | 10   | 11   | 12   | 13   | 14   | 15   |
|-------------|------|------|------|------|------|------|------|------|------|------|------|------|------|------|------|
| 1           | 1.00 |      |      |      |      |      |      |      |      |      |      |      |      |      |      |
| 2           | 0.69 | 1.00 |      |      |      |      |      |      |      |      |      |      |      |      |      |
| 3           | 0.61 | 0.73 | 1.00 |      |      |      |      |      |      |      |      |      |      |      |      |
| 4           | 0.56 | 0.63 | 0.73 | 1.00 |      |      |      |      |      |      |      |      |      |      |      |
| 5           | 0.53 | 0.57 | 0.64 | 0.76 | 1.00 |      |      |      |      |      |      |      |      |      |      |
| 6           | 0.46 | 0.53 | 0.57 | 0.65 | 0.76 | 1.00 |      |      |      |      |      |      |      |      |      |
| 7           | 0.42 | 0.48 | 0.51 | 0.59 | 0.67 | 0.72 | 1.00 |      |      |      |      |      |      |      |      |
| 8           | 0.34 | 0.39 | 0.42 | 0.50 | 0.56 | 0.60 | 0.72 | 1.00 |      |      |      |      |      |      |      |
| 9           | 0.36 | 0.36 | 0.39 | 0.44 | 0.48 | 0.54 | 0.60 | 0.74 | 1.00 |      |      |      |      |      |      |
| 10          | 0.26 | 0.26 | 0.29 | 0.34 | 0.38 | 0.40 | 0.49 | 0.57 | 0.71 | 1.00 |      |      |      |      |      |
| 11          | 0.27 | 0.28 | 0.27 | 0.31 | 0.34 | 0.37 | 0.43 | 0.49 | 0.57 | 0.64 | 1.00 |      |      |      |      |
| 12          | 0.20 | 0.21 | 0.22 | 0.23 | 0.25 | 0.28 | 0.34 | 0.36 | 0.45 | 0.54 | 0.67 | 1.00 |      |      |      |
| 13          | 0.21 | 0.19 | 0.19 | 0.19 | 0.21 | 0.26 | 0.31 | 0.33 | 0.40 | 0.43 | 0.54 | 0.70 | 1.00 |      |      |
| 14          | 0.20 | 0.19 | 0.17 | 0.17 | 0.19 | 0.21 | 0.21 | 0.24 | 0.30 | 0.30 | 0.42 | 0.50 | 0.64 | 1.00 |      |
| 15          | 0.17 | 0.14 | 0.13 | 0.10 | 0.13 | 0.14 | 0.16 | 0.18 | 0.23 | 0.27 | 0.35 | 0.43 | 0.49 | 0.64 | 1.00 |

**D) Hospitalization**

| Time Period | 1    | 2    | 3    | 4     | 5    | 6    | 7    | 8    | 9    | 10   | 11   | 12   | 13   | 14   | 15   |
|-------------|------|------|------|-------|------|------|------|------|------|------|------|------|------|------|------|
| 1           | 1.00 |      |      |       |      |      |      |      |      |      |      |      |      |      |      |
| 2           | 0.23 | 1.00 |      |       |      |      |      |      |      |      |      |      |      |      |      |
| 3           | 0.16 | 0.17 | 1.00 |       |      |      |      |      |      |      |      |      |      |      |      |
| 4           | 0.08 | 0.14 | 0.15 | 1.00  |      |      |      |      |      |      |      |      |      |      |      |
| 5           | 0.01 | 0.02 | 0.08 | 0.10  | 1.00 |      |      |      |      |      |      |      |      |      |      |
| 6           | 0.12 | 0.15 | 0.14 | 0.12  | 0.16 | 1.00 |      |      |      |      |      |      |      |      |      |
| 7           | 0.08 | 0.05 | 0.10 | 0.12  | 0.09 | 0.14 | 1.00 |      |      |      |      |      |      |      |      |
| 8           | 0.07 | 0.16 | 0.12 | 0.11  | 0.08 | 0.16 | 0.16 | 1.00 |      |      |      |      |      |      |      |
| 9           | 0.07 | 0.03 | 0.09 | 0.08  | 0.07 | 0.10 | 0.11 | 0.18 | 1.00 |      |      |      |      |      |      |
| 10          | 0.08 | 0.08 | 0.12 | 0.09  | 0.06 | 0.06 | 0.08 | 0.16 | 0.23 | 1.00 |      |      |      |      |      |
| 11          | 0.05 | 0.07 | 0.09 | 0.06  | 0.01 | 0.08 | 0.06 | 0.07 | 0.20 | 0.20 | 1.00 |      |      |      |      |
| 12          | 0.10 | 0.08 | 0.06 | 0.03  | 0.02 | 0.09 | 0.09 | 0.05 | 0.11 | 0.12 | 0.19 | 1.00 |      |      |      |
| 13          | 0.06 | 0.07 | 0.05 | 0.02  | 0.01 | 0.04 | 0.07 | 0.12 | 0.11 | 0.16 | 0.14 | 0.27 | 1.00 |      |      |
| 14          | 0.08 | 0.10 | 0.10 | 0.05  | 0.06 | 0.03 | 0.10 | 0.06 | 0.11 | 0.17 | 0.21 | 0.24 | 0.37 | 1.00 |      |
| 15          | 0.12 | 0.04 | 0.10 | -0.01 | 0.00 | 0.05 | 0.11 | 0.02 | 0.09 | 0.03 | 0.06 | 0.12 | 0.15 | 0.23 | 1.00 |

**Table 3: Mean (standard deviation) for predicted probabilities of being a Juvenile Arthritis (JA) case for the longitudinal discriminant analysis over the time periods using the full model, by JA status and fold**

**A) Marginal Prediction Approach**

| Time Period | JA Cases       |                |                |                |                |                | Non-JA Controls |                |                |                |                |                |
|-------------|----------------|----------------|----------------|----------------|----------------|----------------|-----------------|----------------|----------------|----------------|----------------|----------------|
|             | Fold 1         | Fold 2         | Fold 3         | Fold 4         | Fold 5         | Overall        | Fold 1          | Fold 2         | Fold 3         | Fold 4         | Fold 5         | Overall        |
| 1           | 0.57<br>(0.21) | 0.50<br>(0.17) | 0.53<br>(0.20) | 0.48<br>(0.20) | 0.51<br>(0.18) | 0.52<br>(0.19) | 0.47<br>(0.10)  | 0.46<br>(0.11) | 0.45<br>(0.07) | 0.48<br>(0.12) | 0.44<br>(0.10) | 0.46<br>(0.10) |
| 2           | 0.60<br>(0.26) | 0.51<br>(0.21) | 0.54<br>(0.25) | 0.53<br>(0.26) | 0.51<br>(0.23) | 0.54<br>(0.24) | 0.45<br>(0.11)  | 0.43<br>(0.12) | 0.42<br>(0.11) | 0.46<br>(0.14) | 0.41<br>(0.12) | 0.43<br>(0.12) |
| 3           | 0.65<br>(0.29) | 0.55<br>(0.25) | 0.54<br>(0.27) | 0.58<br>(0.29) | 0.52<br>(0.26) | 0.57<br>(0.27) | 0.42<br>(0.12)  | 0.41<br>(0.14) | 0.40<br>(0.12) | 0.44<br>(0.14) | 0.40<br>(0.15) | 0.41<br>(0.13) |
| 4           | 0.65<br>(0.31) | 0.57<br>(0.28) | 0.54<br>(0.28) | 0.62<br>(0.30) | 0.54<br>(0.28) | 0.58<br>(0.29) | 0.42<br>(0.14)  | 0.38<br>(0.14) | 0.38<br>(0.12) | 0.43<br>(0.16) | 0.39<br>(0.16) | 0.40<br>(0.14) |
| 5           | 0.66<br>(0.33) | 0.59<br>(0.30) | 0.56<br>(0.30) | 0.64<br>(0.32) | 0.58<br>(0.30) | 0.61<br>(0.31) | 0.41<br>(0.16)  | 0.38<br>(0.17) | 0.36<br>(0.13) | 0.42<br>(0.17) | 0.40<br>(0.19) | 0.39<br>(0.16) |
| 6           | 0.66<br>(0.34) | 0.60<br>(0.32) | 0.59<br>(0.31) | 0.66<br>(0.32) | 0.61<br>(0.31) | 0.62<br>(0.32) | 0.41<br>(0.17)  | 0.38<br>(0.18) | 0.34<br>(0.13) | 0.42<br>(0.20) | 0.41<br>(0.21) | 0.39<br>(0.18) |
| 7           | 0.69<br>(0.34) | 0.63<br>(0.32) | 0.61<br>(0.32) | 0.68<br>(0.32) | 0.63<br>(0.32) | 0.65<br>(0.32) | 0.40<br>(0.18)  | 0.37<br>(0.20) | 0.34<br>(0.17) | 0.41<br>(0.21) | 0.42<br>(0.22) | 0.39<br>(0.20) |
| 8           | 0.71<br>(0.34) | 0.65<br>(0.32) | 0.64<br>(0.32) | 0.70<br>(0.31) | 0.65<br>(0.32) | 0.67<br>(0.32) | 0.40<br>(0.20)  | 0.37<br>(0.21) | 0.34<br>(0.18) | 0.42<br>(0.22) | 0.42<br>(0.23) | 0.39<br>(0.21) |
| 9           | 0.72<br>(0.34) | 0.68<br>(0.31) | 0.65<br>(0.33) | 0.73<br>(0.32) | 0.68<br>(0.32) | 0.69<br>(0.32) | 0.39<br>(0.22)  | 0.35<br>(0.21) | 0.34<br>(0.19) | 0.39<br>(0.22) | 0.42<br>(0.24) | 0.38<br>(0.22) |
| 10          | 0.72<br>(0.35) | 0.70<br>(0.32) | 0.66<br>(0.34) | 0.75<br>(0.32) | 0.70<br>(0.33) | 0.71<br>(0.33) | 0.37<br>(0.24)  | 0.33<br>(0.22) | 0.32<br>(0.19) | 0.39<br>(0.23) | 0.42<br>(0.27) | 0.37<br>(0.23) |
| 11          | 0.74<br>(0.34) | 0.73<br>(0.31) | 0.69<br>(0.33) | 0.78<br>(0.30) | 0.72<br>(0.32) | 0.73<br>(0.32) | 0.35<br>(0.25)  | 0.31<br>(0.22) | 0.31<br>(0.22) | 0.38<br>(0.24) | 0.40<br>(0.27) | 0.35<br>(0.24) |
| 12          | 0.76<br>(0.34) | 0.75<br>(0.30) | 0.73<br>(0.31) | 0.81<br>(0.28) | 0.74<br>(0.32) | 0.76<br>(0.31) | 0.34<br>(0.24)  | 0.30<br>(0.24) | 0.29<br>(0.24) | 0.35<br>(0.26) | 0.39<br>(0.29) | 0.33<br>(0.25) |
| 13          | 0.78<br>(0.32) | 0.78<br>(0.28) | 0.78<br>(0.29) | 0.84<br>(0.27) | 0.75<br>(0.31) | 0.79<br>(0.29) | 0.31<br>(0.25)  | 0.27<br>(0.24) | 0.27<br>(0.26) | 0.34<br>(0.26) | 0.37<br>(0.30) | 0.31<br>(0.26) |

|    |                |                |                |                |                |                |                |                |                |                |                |                |
|----|----------------|----------------|----------------|----------------|----------------|----------------|----------------|----------------|----------------|----------------|----------------|----------------|
| 14 | 0.79<br>(0.31) | 0.81<br>(0.27) | 0.81<br>(0.27) | 0.85<br>(0.26) | 0.76<br>(0.32) | 0.80<br>(0.29) | 0.29<br>(0.25) | 0.24<br>(0.23) | 0.26<br>(0.27) | 0.32<br>(0.27) | 0.34<br>(0.30) | 0.29<br>(0.26) |
| 15 | 0.80<br>(0.29) | 0.81<br>(0.26) | 0.82<br>(0.27) | 0.85<br>(0.26) | 0.77<br>(0.31) | 0.81<br>(0.28) | 0.25<br>(0.26) | 0.21<br>(0.23) | 0.24<br>(0.27) | 0.29<br>(0.28) | 0.30<br>(0.30) | 0.26<br>(0.27) |

### B) Random Effects Prediction Approach

| Time<br>Period | JA Cases       |                |                |                |                |                | Non-JA Controls |                |                |                |                |                |
|----------------|----------------|----------------|----------------|----------------|----------------|----------------|-----------------|----------------|----------------|----------------|----------------|----------------|
|                | Fold 1         | Fold 2         | Fold 3         | Fold 4         | Fold 5         | Overall        | Fold 1          | Fold 2         | Fold 3         | Fold 4         | Fold 5         | Overall        |
| 1              | 0.50<br>(0.05) | 0.46<br>(0.06) | 0.50<br>(0.05) | 0.43<br>(0.08) | 0.51<br>(0.07) | 0.48<br>(0.06) | 0.49<br>(0.04)  | 0.45<br>(0.05) | 0.50<br>(0.03) | 0.45<br>(0.06) | 0.49<br>(0.06) | 0.48<br>(0.05) |
| 2              | 0.53<br>(0.12) | 0.45<br>(0.12) | 0.50<br>(0.10) | 0.44<br>(0.12) | 0.49<br>(0.12) | 0.48<br>(0.12) | 0.46<br>(0.05)  | 0.42<br>(0.06) | 0.46<br>(0.04) | 0.43<br>(0.07) | 0.45<br>(0.06) | 0.44<br>(0.06) |
| 3              | 0.57<br>(0.20) | 0.47<br>(0.18) | 0.50<br>(0.16) | 0.48<br>(0.20) | 0.49<br>(0.17) | 0.50<br>(0.18) | 0.43<br>(0.06)  | 0.39<br>(0.08) | 0.43<br>(0.05) | 0.41<br>(0.08) | 0.41<br>(0.07) | 0.41<br>(0.07) |
| 4              | 0.60<br>(0.25) | 0.51<br>(0.23) | 0.52<br>(0.21) | 0.53<br>(0.25) | 0.50<br>(0.22) | 0.53<br>(0.23) | 0.42<br>(0.07)  | 0.37<br>(0.08) | 0.41<br>(0.06) | 0.39<br>(0.09) | 0.38<br>(0.07) | 0.39<br>(0.07) |
| 5              | 0.62<br>(0.28) | 0.53<br>(0.26) | 0.53<br>(0.24) | 0.56<br>(0.28) | 0.52<br>(0.24) | 0.55<br>(0.26) | 0.40<br>(0.07)  | 0.35<br>(0.08) | 0.39<br>(0.06) | 0.38<br>(0.09) | 0.37<br>(0.08) | 0.38<br>(0.08) |
| 6              | 0.63<br>(0.30) | 0.55<br>(0.28) | 0.54<br>(0.27) | 0.58<br>(0.30) | 0.55<br>(0.27) | 0.57<br>(0.28) | 0.38<br>(0.08)  | 0.34<br>(0.09) | 0.37<br>(0.06) | 0.36<br>(0.10) | 0.36<br>(0.10) | 0.36<br>(0.09) |
| 7              | 0.64<br>(0.31) | 0.57<br>(0.30) | 0.55<br>(0.28) | 0.60<br>(0.31) | 0.57<br>(0.29) | 0.59<br>(0.30) | 0.37<br>(0.08)  | 0.32<br>(0.10) | 0.35<br>(0.07) | 0.35<br>(0.12) | 0.35<br>(0.10) | 0.35<br>(0.09) |
| 8              | 0.65<br>(0.32) | 0.58<br>(0.31) | 0.57<br>(0.30) | 0.62<br>(0.32) | 0.59<br>(0.31) | 0.60<br>(0.31) | 0.36<br>(0.10)  | 0.31<br>(0.10) | 0.33<br>(0.08) | 0.35<br>(0.12) | 0.33<br>(0.10) | 0.34<br>(0.10) |
| 9              | 0.66<br>(0.33) | 0.59<br>(0.31) | 0.58<br>(0.31) | 0.65<br>(0.32) | 0.61<br>(0.32) | 0.62<br>(0.32) | 0.35<br>(0.11)  | 0.30<br>(0.10) | 0.32<br>(0.09) | 0.33<br>(0.13) | 0.32<br>(0.11) | 0.32<br>(0.11) |
| 10             | 0.67<br>(0.33) | 0.61<br>(0.32) | 0.59<br>(0.32) | 0.67<br>(0.32) | 0.63<br>(0.32) | 0.63<br>(0.32) | 0.34<br>(0.12)  | 0.28<br>(0.10) | 0.31<br>(0.10) | 0.32<br>(0.13) | 0.31<br>(0.12) | 0.31<br>(0.11) |
| 11             | 0.69<br>(0.32) | 0.64<br>(0.31) | 0.61<br>(0.32) | 0.69<br>(0.31) | 0.65<br>(0.32) | 0.66<br>(0.32) | 0.32<br>(0.12)  | 0.26<br>(0.11) | 0.29<br>(0.11) | 0.31<br>(0.14) | 0.30<br>(0.13) | 0.30<br>(0.12) |
| 12             | 0.70<br>(0.32) | 0.66<br>(0.31) | 0.63<br>(0.31) | 0.73<br>(0.30) | 0.68<br>(0.31) | 0.68<br>(0.31) | 0.31<br>(0.13)  | 0.26<br>(0.12) | 0.28<br>(0.12) | 0.30<br>(0.15) | 0.29<br>(0.13) | 0.29<br>(0.13) |

|    |                |                |                |                |                |                |                |                |                |                |                |                |
|----|----------------|----------------|----------------|----------------|----------------|----------------|----------------|----------------|----------------|----------------|----------------|----------------|
| 13 | 0.73<br>(0.30) | 0.69<br>(0.29) | 0.67<br>(0.30) | 0.76<br>(0.28) | 0.70<br>(0.30) | 0.71<br>(0.29) | 0.30<br>(0.14) | 0.24<br>(0.12) | 0.27<br>(0.13) | 0.28<br>(0.14) | 0.27<br>(0.13) | 0.27<br>(0.13) |
| 14 | 0.76<br>(0.28) | 0.72<br>(0.27) | 0.71<br>(0.28) | 0.78<br>(0.27) | 0.72<br>(0.29) | 0.74<br>(0.28) | 0.28<br>(0.15) | 0.23<br>(0.12) | 0.26<br>(0.15) | 0.27<br>(0.15) | 0.25<br>(0.14) | 0.26<br>(0.14) |
| 15 | 0.79<br>(0.24) | 0.74<br>(0.25) | 0.73<br>(0.27) | 0.79<br>(0.26) | 0.74<br>(0.27) | 0.76<br>(0.26) | 0.27<br>(0.16) | 0.20<br>(0.13) | 0.24<br>(0.16) | 0.26<br>(0.16) | 0.23<br>(0.14) | 0.24<br>(0.15) |



**Figure 1: Mean predicted probabilities of being a Juvenile Arthritis (JA) case for the longitudinal discriminant analysis over the time periods using the full model averaged across folds, by JA status**

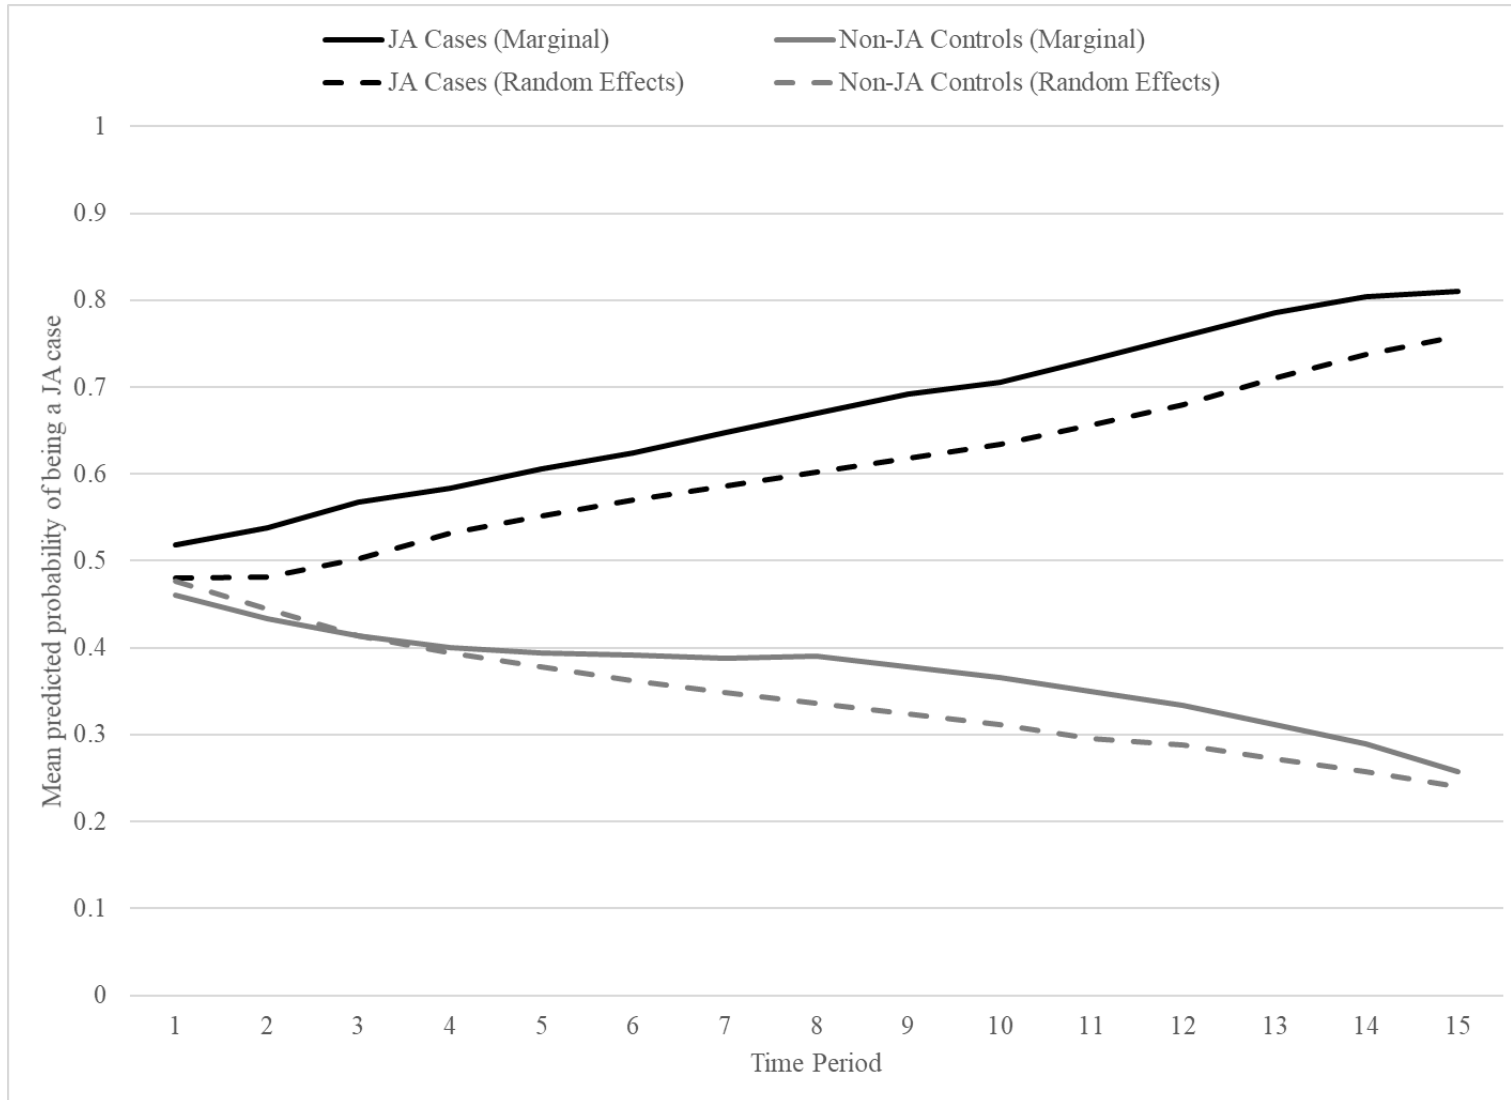

Supplement: MOESM1 [file 19166600]
